# Supplementary material for: Attenuation of hedgehog/GLI signaling by NT1721 extends survival in pancreatic cancer
Source: Springer Nature journal article supplement (doi:10.1186/s13046-019-1445-z), 2019-10-28

**A**

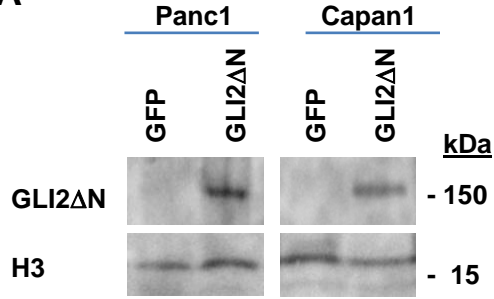

**B**

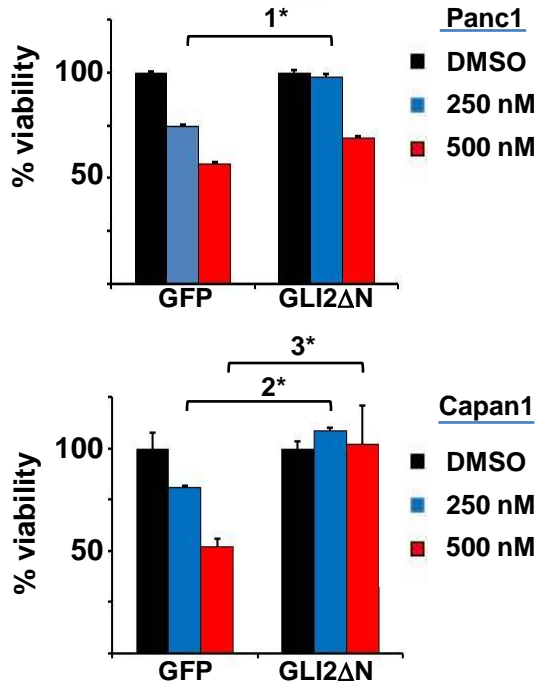

**C**

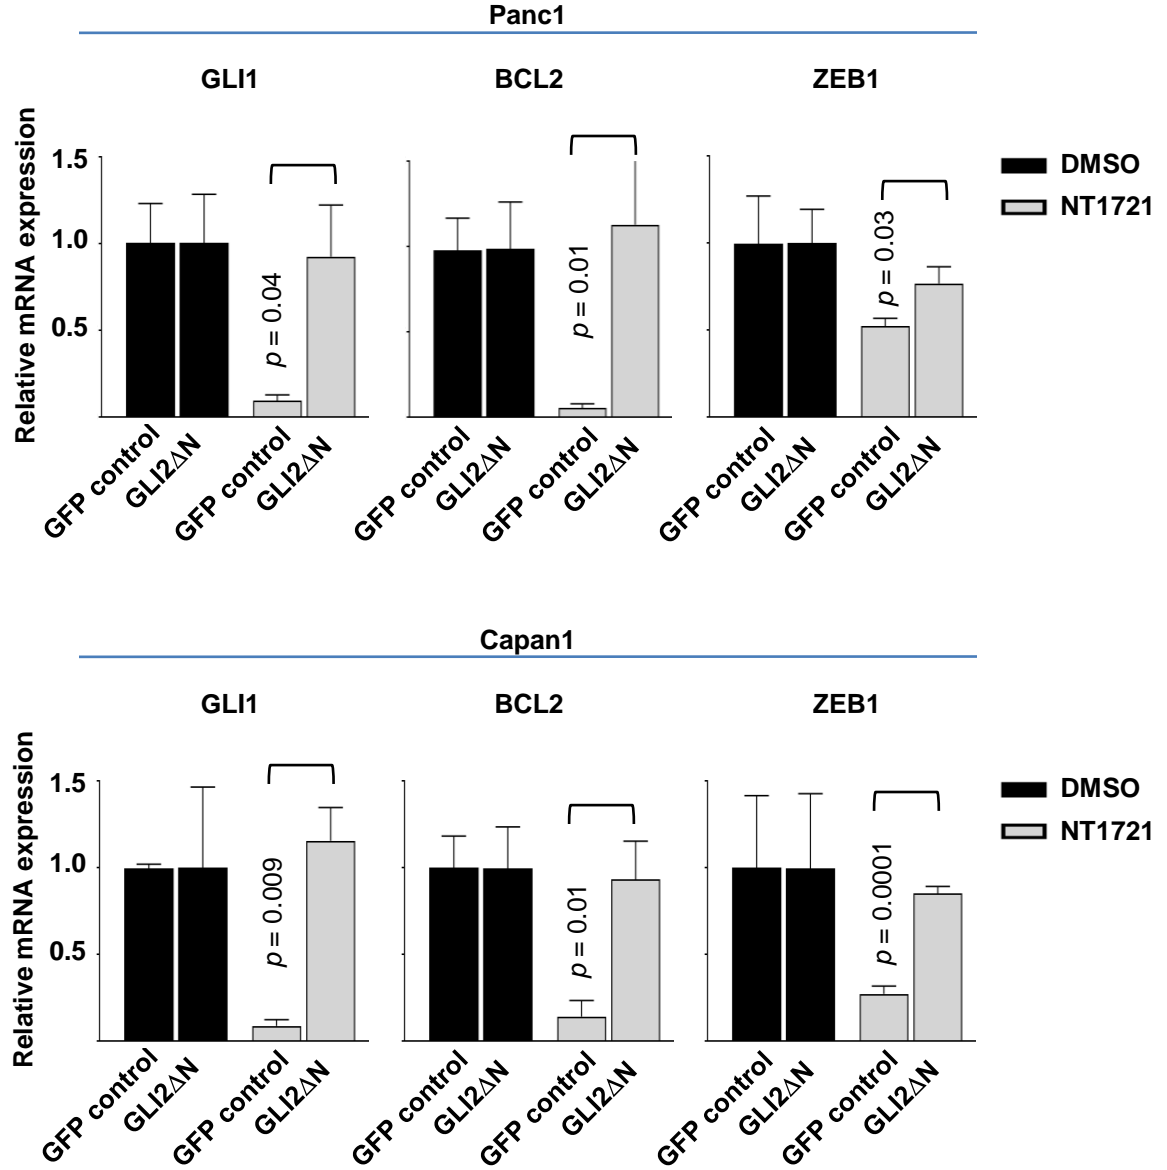

Supplement: MOESM1 [file 17319670]
